# Supplementary material
Source: ML conference proceedings conference paper supplement (https://openreview.net/forum?id=Vzdbjtz6Tys)
Supplement: supplementary_material [file attachment]

## 5 Appendix

Supplementary Table 1: Classification accuracy across skin conditions when synthetic images are included in the training set

| Trained on FST I/II + 32 synthetic images |                      |              |                    |                         |                   |            |                         |
|-------------------------------------------|----------------------|--------------|--------------------|-------------------------|-------------------|------------|-------------------------|
| FST                                       | Basal Cell Carcinoma | Folliculitis | Nematode Infection | Neutrophilic Dermatoses | Prurigo Nodularis | Psoriasis  | Squamous Cell Carcinoma |
| <i>Fitzpatrick Images Only</i>            |                      |              |                    |                         |                   |            |                         |
| III-IV                                    | 0.543, 188           | 0.600, 150   | 0.655, 139         | 0.345, 119              | 0.611, 95         | 0.531, 192 | 0.451, 193              |
| V-VI                                      | 0.419, 31            | 0.475, 40    | 0.409, 44          | 0.174, 46               | 0.711, 38         | 0.792, 77  | 0.556, 63               |
| <i>Psoriasis</i>                          |                      |              |                    |                         |                   |            |                         |
| III-IV                                    | 0.580, 188           | 0.533, 150   | 0.662, 139         | 0.395, 119              | 0.653, 95         | 0.510, 192 | 0.420, 193              |
| V-VI                                      | 0.516, 31            | 0.475, 40    | 0.455, 44          | 0.283, 46               | 0.632, 38         | 0.857, 77  | 0.524, 63               |
| <i>Neutrophilic Dermatoses</i>            |                      |              |                    |                         |                   |            |                         |
| III-IV                                    | 0.569, 188           | 0.487, 150   | 0.655, 139         | 0.454, 119              | 0.653, 95         | 0.557, 192 | 0.456, 193              |
| V-VI                                      | 0.516, 31            | 0.550, 40    | 0.386, 44          | 0.676, 37               | 0.684, 38         | 0.694, 85  | 0.429, 63               |
| <i>Squamous Cell Carcinoma</i>            |                      |              |                    |                         |                   |            |                         |
| III-IV                                    | 0.569, 188           | 0.493, 150   | 0.640, 139         | 0.294, 119              | 0.695, 95         | 0.531, 192 | 0.461, 193              |
| V-VI                                      | 0.323, 31            | 0.475, 40    | 0.341, 44          | 0.174, 46               | 0.684, 38         | 0.694, 85  | 0.691, 55               |
| Trained on FST V/VI + 32 synthetic images |                      |              |                    |                         |                   |            |                         |
| FST                                       | Basal Cell Carcinoma | Folliculitis | Nematode Infection | Neutrophilic Dermatoses | Prurigo Nodularis | Psoriasis  | Squamous Cell Carcinoma |
| <i>Fitzpatrick Images Only</i>            |                      |              |                    |                         |                   |            |                         |
| I-II                                      | 0.664, 241           | 0.110, 127   | 0.704, 71          | 0.157, 185              | 0.314, 35         | 0.196, 337 | 0.236, 280              |
| III-IV                                    | 0.681, 188           | 0.200, 150   | 0.640, 139         | 0.303, 119              | 0.442, 95         | 0.240, 192 | 0.394, 193              |
| <i>Psoriasis</i>                          |                      |              |                    |                         |                   |            |                         |
| I-II                                      | 0.656, 241           | 0.173, 127   | 0.718, 71          | 0.119, 185              | 0.314, 35         | 0.466, 337 | 0.225, 280              |
| III-IV                                    | 0.729, 188           | 0.247, 150   | 0.647, 139         | 0.294, 119              | 0.389, 95         | 0.401, 192 | 0.352, 193              |
| <i>Neutrophilic Dermatoses</i>            |                      |              |                    |                         |                   |            |                         |
| I-II                                      | 0.485, 241           | 0.094, 127   | 0.648, 71          | 0.525, 177              | 0.286, 35         | 0.252, 345 | 0.257, 280              |
| III-IV                                    | 0.660, 188           | 0.227, 150   | 0.619, 139         | 0.521, 119              | 0.463, 95         | 0.276, 192 | 0.378, 193              |
| <i>Squamous Cell Carcinoma</i>            |                      |              |                    |                         |                   |            |                         |
| I-II                                      | 0.307, 241           | 0.165, 127   | 0.775, 71          | 0.114, 185              | 0.371, 35         | 0.261, 345 | 0.511, 272              |
| III-IV                                    | 0.505, 188           | 0.253, 150   | 0.691, 139         | 0.286, 119              | 0.421, 95         | 0.318, 192 | 0.446, 193              |

Supplementary Table 2: All text prompts used for synthetic image generation alongside the number of attempts with each prompt and the number of images selected for the study using that prompt.

| All text prompts for DALL-E 2 generations                            |          |            |
|----------------------------------------------------------------------|----------|------------|
| Prompt: "An image of..."                                             | attempts | # selected |
| ... neutrophilic dermatoses on the leg of a very dark-skinned woman  | 2        | 3          |
| ... neutrophilic dermatoses on the shoulder of a dark-skinned woman  | 1        | 1          |
| ... neutrophilic dermatoses on the leg of a dark-skinned man         | 2        | 2          |
| ... neutrophilic dermatoses on the arm of a dark-skinned man         | 1        | 2          |
| ... neutrophilic dermatoses on the hand of a dark-skinned individual | 1        | 2          |
| ... neutrophilic dermatoses on the arm of a dark-skinned individual  | 2        | 2          |
| ... neutrophilic dermatoses on the leg of a very dark-skinned woman  | 1        | 2          |
| ... neutrophilic dermatoses on the hand of a very dark-skinned woman | 1        | 2          |
| ... neutrophilic dermatoses on the leg of a very dark-skinned man    | 2        | 2          |
| ... neutrophilic dermatoses on the arm of a very dark-skinned man    | 1        | 2          |

**Table 2 continued from previous page**

|                                                                                |   |   |
|--------------------------------------------------------------------------------|---|---|
| ... neutrophilic dermatoses on the leg of a very dark-skinned individual       | 2 | 2 |
| ... neutrophilic dermatoses on the elbow of a very dark-skinned individual     | 1 | 2 |
| ... neutrophilic dermatoses on the foot of a dark-skinned man                  | 1 | 2 |
| ... neutrophilic dermatoses on the neck of a dark-skinned man                  | 2 | 2 |
| ... neutrophilic dermatoses on the arm of a very dark-skinned woman            | 1 | 2 |
| ... neutrophilic dermatoses on the leg of a very dark-skinned woman            | 1 | 2 |
| ... neutrophilic dermatoses on the neck of a light-skinned woman               | 1 | 2 |
| ... neutrophilic dermatoses on the face of a light-skinned woman               | 2 | 2 |
| ... neutrophilic dermatoses on the hand of a light-skinned individual          | 1 | 2 |
| ... neutrophilic dermatoses on the arm of a light-skinned individual           | 2 | 2 |
| ... neutrophilic dermatoses on the arm of a light-skinned individual           | 2 | 2 |
| ... neutrophilic dermatoses on the hand of a light-skinned individual          | 2 | 2 |
| ... neutrophilic dermatoses on the shoulder of a light-skinned man             | 2 | 2 |
| ... neutrophilic dermatoses on the face of a light-skinned man                 | 1 | 2 |
| ... neutrophilic dermatoses on the foot of a light-skinned woman               | 2 | 2 |
| ... neutrophilic dermatoses on the feet of a light-skinned woman               | 2 | 2 |
| ... neutrophilic dermatoses on the shoulder of a very light-skinned individual | 2 | 2 |
| ... neutrophilic dermatoses on the face of a very light-skinned individual     | 1 | 2 |
| ... neutrophilic dermatoses on the back of a very light-skinned man            | 1 | 2 |
| ... neutrophilic dermatoses on the thigh of a very light-skinned man           | 2 | 2 |
| ... neutrophilic dermatoses on the arm of a light-skinned woman                | 1 | 2 |
| ... neutrophilic dermatoses on the leg of a light-skinned woman                | 1 | 2 |
| ... psoriasis on the back of a dark-skinned man                                | 1 | 2 |
| ... psoriasis on the leg of a dark-skinned woman                               | 1 | 2 |
| ... psoriasis on the thigh of a very dark-skinned man                          | 1 | 2 |
| ... psoriasis on the arm of a very dark-skinned man                            | 2 | 2 |
| ... psoriasis on the foot of a very dark-skinned woman                         | 1 | 2 |
| ... psoriasis on the foot of a very dark-skinned woman                         | 2 | 2 |
| ... psoriasis on the back of a dark-skinned individual                         | 3 | 2 |
| ... psoriasis on the arm of a dark-skinned individual                          | 2 | 1 |
| ... psoriasis under the knee of a dark-skinned individual                      | 1 | 1 |
| ... psoriasis on the legs of a very dark-skinned woman                         | 1 | 2 |
| ... psoriasis on the arms of a very dark-skinned woman                         | 1 | 2 |
| ... psoriasis on the cheek of a dark-skinned man                               | 1 | 2 |
| ... psoriasis on the face of a dark-skinned man                                | 1 | 2 |
| ... psoriasis on the foot of a very dark-skinned man                           | 2 | 1 |
| ... psoriasis on the hand of a very dark-skinned man                           | 2 | 3 |
| ... psoriasis on the knee of a dark-skinned individual                         | 1 | 3 |
| ... psoriasis on the back of a dark-skinned individual                         | 1 | 1 |
| ... psoriasis on the fingers of a light-skinned individual                     | 2 | 2 |
| ... psoriasis on the fingernails of a light-skinned individual                 | 1 | 2 |
| ... psoriasis on the fingernails of a light-skinned individual                 | 1 | 2 |
| ... psoriasis on the fingernails of a light-skinned individual                 | 1 | 2 |
| ... psoriasis on the knee of a light-skinned woman                             | 2 | 3 |
| ... psoriasis on the back of a light-skinned woman                             | 1 | 1 |
| ... psoriasis on the arm of a light-skinned woman                              | 2 | 1 |
| ... psoriasis on the leg of a light-skinned woman                              | 1 | 3 |
| ... psoriasis on the legs of a light-skinned man                               | 1 | 2 |
| ... psoriasis on the elbow of a light-skinned man                              | 1 | 2 |
| ... psoriasis on the fingernails of a light-skinned individual                 | 1 | 3 |
| ... psoriasis on the hand of a light-skinned individual                        | 1 | 1 |
| ... psoriasis on the leg of a very light-skinned woman                         | 1 | 2 |
| ... psoriasis on the arm of a very light-skinned woman                         | 1 | 2 |
| ... psoriasis on the legs of a light-skinned man                               | 1 | 2 |
| ... psoriasis on the hands of a light-skinned man                              | 2 | 2 |
| ... squamous cell carcinoma on the nose of a light-skinned woman               | 1 | 2 |
| ... squamous cell carcinoma on the face of a light-skinned woman               | 1 | 2 |
| ... squamous cell carcinoma on the skin of a light-skinned individual          | 1 | 2 |

**Table 2 continued from previous page**

|                                                                            |   |   |
|----------------------------------------------------------------------------|---|---|
| ... squamous cell carcinoma on the skin of a light-skinned individual      | 1 | 2 |
| ... squamous cell carcinoma on the neck of a light-skinned individual      | 1 | 2 |
| ... squamous cell carcinoma on the arm of a light-skinned individual       | 1 | 2 |
| ... squamous cell carcinoma on the leg of a very light-skinned man         | 1 | 2 |
| ... squamous cell carcinoma on the arm of a very light-skinned man         | 1 | 2 |
| ... squamous cell carcinoma on the shoulder of a very light-skinned woman  | 1 | 2 |
| ... squamous cell carcinoma on the back of a very light-skinned woman      | 1 | 2 |
| ... squamous cell carcinoma on the neck of a very light-skinned individual | 2 | 2 |
| ... squamous cell carcinoma on the skin of a very light-skinned individual | 1 | 2 |
| ... squamous cell carcinoma on the skin of a very light-skinned man        | 1 | 2 |
| ... squamous cell carcinoma on the shoulder of a very light-skinned man    | 2 | 2 |
| ... squamous cell carcinoma under the ear of a light-skinned individual    | 1 | 3 |
| ... squamous cell carcinoma under the ear of a light-skinned individual    | 1 | 1 |
| ... squamous cell carcinoma on the knee of a dark-skinned individual       | 1 | 1 |
| ... squamous cell carcinoma on the knee of a dark-skinned individual       | 1 | 3 |
| ... squamous cell carcinoma on the nose of a dark-skinned man              | 1 | 2 |
| ... squamous cell carcinoma on the cheek of a dark-skinned man             | 1 | 2 |
| ... squamous cell carcinoma on the hands of a dark-skinned woman           | 2 | 3 |
| ... squamous cell carcinoma on the leg of a dark-skinned woman             | 1 | 1 |
| ... squamous cell carcinoma on the arm of a dark-skinned individual        | 1 | 2 |
| ... squamous cell carcinoma on the leg of a dark-skinned individual        | 1 | 2 |
| ... squamous cell carcinoma on the elbow of a dark-skinned man             | 1 | 3 |
| ... squamous cell carcinoma on the knee of a dark-skinned man              | 1 | 1 |
| ... squamous cell carcinoma on the shoulder of a very dark-skinned woman   | 1 | 2 |
| ... squamous cell carcinoma on the legs of a very dark-skinned woman       | 2 | 2 |
| ... squamous cell carcinoma on the leg of a dark-skinned man               | 1 | 2 |
| ... squamous cell carcinoma on the arm of a dark-skinned man               | 1 | 2 |
| ... squamous cell carcinoma on the neck of a very dark-skinned woman       | 1 | 2 |
| ... squamous cell carcinoma on the leg of a very dark-skinned woman        | 1 | 2 |

## Examples of DALL-E 2 images not selected for inclusion in a training set

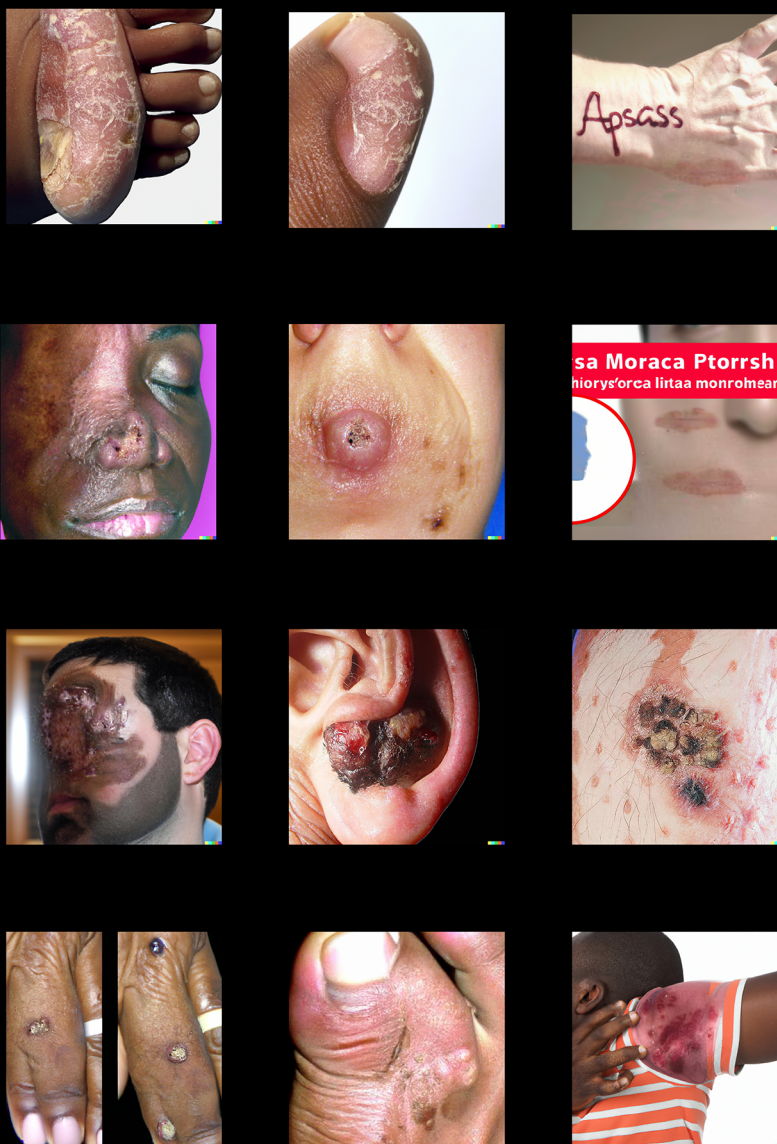

Supplementary Figure 1: **Examples of generated images that were not chosen for inclusion in a training set.** Images were not selected for a variety of reasons, including abnormal changes to anatomy, introduction of irregular artifacts, and misplacement of the disease pathology.
